# Supplementary material for: Influence of Environmental Factors on Forest Understorey Species in Northern Mexico
Source: MDPI journal article supplement (doi:10.3390/f12091198), 2021-09-03
Supplement: s1 [file s1]

# Supplementary material.

## Tables of Influence of environmental factors on forest understorey species in northern Mexico

**Table S1.** Descriptive statistics for the soil variables analyzed.

|                       | Soil variable                             | Mean     | Std. Dev. | Min.   | Max.     | Chi-square statistic | p-value |
|-----------------------|-------------------------------------------|----------|-----------|--------|----------|----------------------|---------|
| <b>EC</b>             | Electric conductivity (dS/m)              | 0.22     | 0.10      | 0.08   | 0.44     | 0.052                | 0.819   |
| <b>NO<sub>3</sub></b> | Nitrate (kg/ha)                           | 24.22    | 16.73     | 9.73   | 68.99    | 2.547                | 0.11    |
| <b>P</b>              | Phosphorus (ppm)                          | 13.93    | 12.75     | 1.31   | 40.44    | 0.144                | 0.703   |
| <b>Ca</b>             | Calcium (ppm)                             | 1,287.00 | 481.00    | 450.00 | 2,376.00 | 0.37                 | 0.542   |
| <b>Mg</b>             | Magnesium (ppm)                           | 356.57   | 211.80    | 114.00 | 990.00   | 0.369                | 0.543   |
| <b>Na</b>             | Sodium (ppm)                              | 117.07   | 43.38     | 56.00  | 205.00   | 0.146                | 0.701   |
| <b>K</b>              | Potassium (ppm)                           | 420.36   | 182.04    | 112.00 | 881.00   | 0.209                | 0.647   |
| <b>Fe</b>             | Iron (ppm)                                | 76.36    | 32.82     | 10.30  | 122.40   | 0.005                | 0.938   |
| <b>Zn</b>             | Zinc (ppm)                                | 0.57     | 0.49      | 0.14   | 2.70     | 0.117                | 0.732   |
| <b>Mn</b>             | Manganese (ppm)                           | 63.53    | 63.59     | 6.04   | 271.92   | 0.243                | 0.621   |
| <b>Cu</b>             | Copper (ppm)                              | 0.31     | 0.12      | 0.12   | 0.58     | 0.417                | 0.518   |
| <b>pH</b>             | pH (numeric)                              | 5.67     | 0.19      | 5.38   | 6.10     | 1.478                | 0.224   |
| <b>OM</b>             | Organic material (%)                      | 3.66     | 3.27      | 0.66   | 14.20    | 0.243                | 0.621   |
| <b>Sat</b>            | Percent saturation (%)                    | 48.63    | 14.84     | 29.50  | 80.00    | 0.036                | 0.849   |
| <b>Sand</b>           | Percent sand (%)                          | 52.35    | 9.62      | 31.42  | 63.42    | 0.052                | 0.819   |
| <b>Silt</b>           | Percent silt (%)                          | 31.14    | 6.95      | 19.28  | 45.28    | 0.036                | 0.849   |
| <b>Clay</b>           | Percent clay (%)                          | 16.51    | 5.74      | 9.30   | 31.30    | 0.052                | 0.818   |
| <b>OB</b>             | Rel. proportion of other bases in CEC (%) | 6.04     | 0.33      | 5.43   | 6.59     | 0.117                | 0.732   |
| <b>%H</b>             | Rel. proportion of H in CEC (%)           | 20.04    | 2.85      | 13.5   | 24.30    | 0.117                | 0.732   |
| <b>%Ca</b>            | Rel. proportion of Ca in CEC (%)          | 43.22    | 6.96      | 21.09  | 52.54    | 0.07                 | 0.790   |
| <b>%Mg</b>            | Rel. proportion of Mg in CEC (%)          | 19.11    | 6.59      | 9.99   | 37.90    | 0.116                | 0.732   |
| <b>%K</b>             | Rel. proportion of K in CEC (%)           | 7.78     | 3.60      | 2.39   | 14.53    | 0.636                | 0.425   |
| <b>%Na</b>            | Rel. proportion of Na in CEC (%)          | 3.85     | 1.80      | 1.03   | 7.53     | 0.901                | 0.342   |
| <b>CEC</b>            | Cation exchange capacity (meq/100 g soil) | 14.90    | 5.01      | 6.51   | 25.12    | 0.243                | 0.621   |
| <b>HC</b>             | Hydraulic conductivity (cm/h)             | 8.74     | 11.37     | 1.50   | 48.40    | 1.67                 | 0.196   |

Significance value ( $\alpha=0.001$  after Bonferroni correction).

**Table S2.** Edaphic variables of greater relative importance for the presence of each species, according to variable selection by Random Forest.

| Variables | Ludi | Codi  | Gewi  | Acwr  | Agpa  | Ceco  | Arpu  |
|-----------|------|-------|-------|-------|-------|-------|-------|
| EC        | 2.93 | 6.13  | 2.20  | 3.28  | 2.26  | 6.12  | 2.89  |
| NO3       | 7.25 | 1.08  | 2.28  | 0.70  | 9.7   | 5.56  | 7.65  |
| P         | 8.98 | 1.07  | 2.69  | 4.44  | 4.67  | 0.72  | 3.89  |
| Ca        | 1.20 | 14.07 | 10.06 | 3.02  | 1.91  | 12.31 | 3.52  |
| Mg        | 2.20 | 1.79  | 12.78 | 3.71  | 3.85  | 1.51  | 1.16  |
| Na        | 4.00 | 1.73  | 2.17  | 1.73  | 2.26  | 0.70  | 5.54  |
| K         | 5.65 | 0.39  | 1.99  | 2.86  | 15.13 | 0.94  | 5.07  |
| Fe        | 3.47 | 6.43  | 3.65  | 1.95  | 3.40  | 18.13 | 4.21  |
| Mn        | 1.03 | 1.73  | 2.88  | 7.02  | 3.16  | 2.51  | 11.79 |
| Cu        | 1.80 | 15.29 | 2.69  | 0.84  | 5.95  | 6.81  | 1.21  |
| Zn        | 2.79 | 9.76  | 1.10  | 1.41  | 1.24  | 5.44  | 3.03  |
| pH        | 4.08 | 0.26  | 1.89  | 0.04  | 1.18  | 3.84  | 2.34  |
| OM        | 6.15 | 0.24  | 0.52  | 5.42  | 10.1  | 1.08  | 6.95  |
| Sat       | 5.77 | 1.73  | 1.35  | 13.49 | 6.71  | 1.34  | 9.43  |
| Sand      | 2.26 | 1.73  | 9.06  | 1.77  | 5.99  | 0.81  | 0.54  |
| Silt      | 2.13 | 0.99  | 8.27  | 0.66  | 3.05  | 0.81  | 3.52  |
| Clay      | 3.41 | 8.63  | 0.94  | 14.27 | 0.84  | 1.99  | 0.51  |
| OB        | 5.06 | 0.44  | 1.99  | 0.29  | 1.38  | 0.38  | 2.08  |
| %H        | 3.06 | 0.07  | 1.34  | 0.03  | 1.34  | 0.69  | 1.86  |
| %Ca       | 2.29 | 5.68  | 2.96  | 3.59  | 2.88  | 8.59  | 3.89  |
| %Mg       | 7.72 | 3.97  | 3.15  | 2.28  | 4.16  | 2.83  | 4.21  |
| %K        | 3.16 | 3.18  | 1.56  | 15.49 | 3.85  | 3.84  | 5.19  |
| %Na       | 2.28 | 3.97  | 5.27  | 4.65  | 1.34  | 1.38  | 2.24  |
| CEC       | 1.46 | 13.26 | 10.76 | 3.28  | 2.31  | 6.25  | 3.37  |
| HC        | 3.67 | 1.54  | 4.23  | 2.25  | 2.26  | 3.30  | 3.26  |

Where: EC: Electric conductivity, NO3: Nitrate (kg/ha), P: Phosphorus (ppm), Ca: Calcium (ppm), Mg: Magnesium (ppm), Na: Sodium (ppm), K: Potassium (ppm), Fe: Iron (ppm), Mn: Manganese (ppm), Cu: Copper (ppm), pH: Hydrogen ion concentration, OM: Organic material (%), Sat: Saturation (%), Sand (%), Silt (%), Clay (%), OB: Relative proportion of other bases in CEC (%), %H: Relative Proportion of H in CEC (%), %Ca: Relative proportion of Ca in CEC (%), %Mg: Relative proportion of Mg in CEC (%), %K: Relative proportion of K in CEC (%), %Na: Relative proportion of Na in CEC (%), CEC: Cation exchange capacity, HC: Hydarulic conductivity (cm/h), Ld: *Lupinus diehlii*, Codi: *Comelinna dianthifolia*, Gewi: *Geraanium wislizeni*, Acwr: *Acmispon wrightii*, Agpa: *Agatache pallida*, Ceco: *Ceanothus coeruleus*, Arpu: *Arctostaphylos pungens*.
